# Supplementary material
Source: publisher figshare collection journal article supplement (https://acs.figshare.com/ndownloader/files/15023000)
Supplement: Supplementary file 1 [file 15023000]

Supporting Information

# Double Network Hydrogels that Mimic the Modulus, Strength and Lubricity of Cartilage

*A. Kristen Means,<sup>†</sup> Courtney S. Shrode,<sup>‡</sup> Lauren V. Whitney,<sup>‡</sup> Daniel A. Ehrhardt,<sup>‡</sup> Melissa A. Grunlan<sup>\*,†,‡,§,||</sup>*

<sup>†</sup>Department of Materials Science & Engineering, Texas A&M University, College Station, TX 77843-3003 (USA)

<sup>‡</sup>Department of Biomedical Engineering, Texas A&M University, College Station, TX 77843-3120 (USA)

<sup>§</sup>Department of Chemistry, Texas A&M University, College Station, TX 77843-3120 (USA)

<sup>||</sup>Center for Remote Health Technologies Systems, Texas A&M University, College Station, TX 77843-3120 (USA)

KEYWORDS: hydrogels, double network, cartilage, ultra-strong, load-bearing

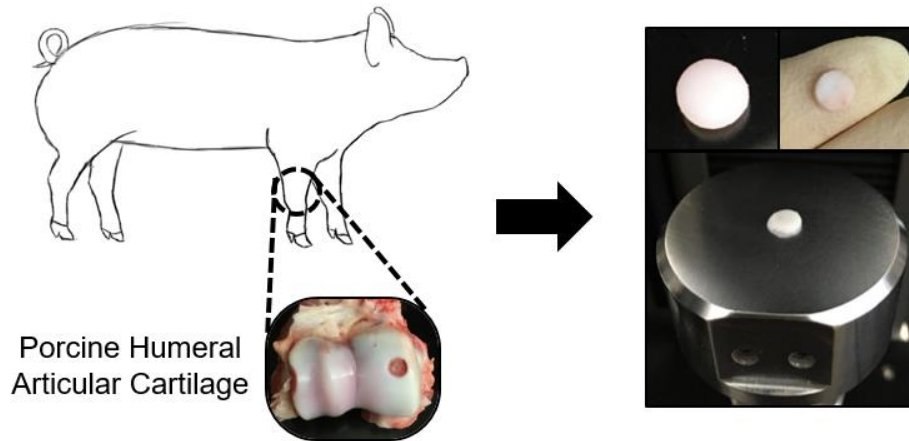

**Figure S1.** Compression of harvested porcine articular cartilage specimen.

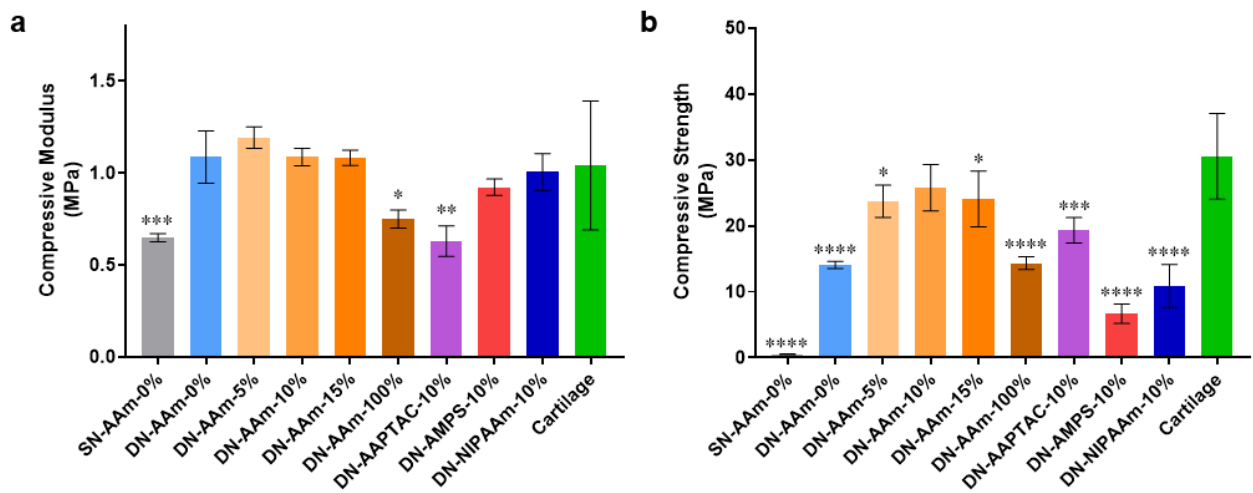

**Figure S2.** Compressive (a) modulus and (b) strength of additional controls compared to porcine articular cartilage. All \*'s indicate statistical significance from cartilage, in which “\*” represents  $p < 0.05$ , “\*\*” represents  $p < 0.01$ , “\*\*\*” represents  $p < 0.001$  and “\*\*\*\*” represents  $p < 0.0001$ .

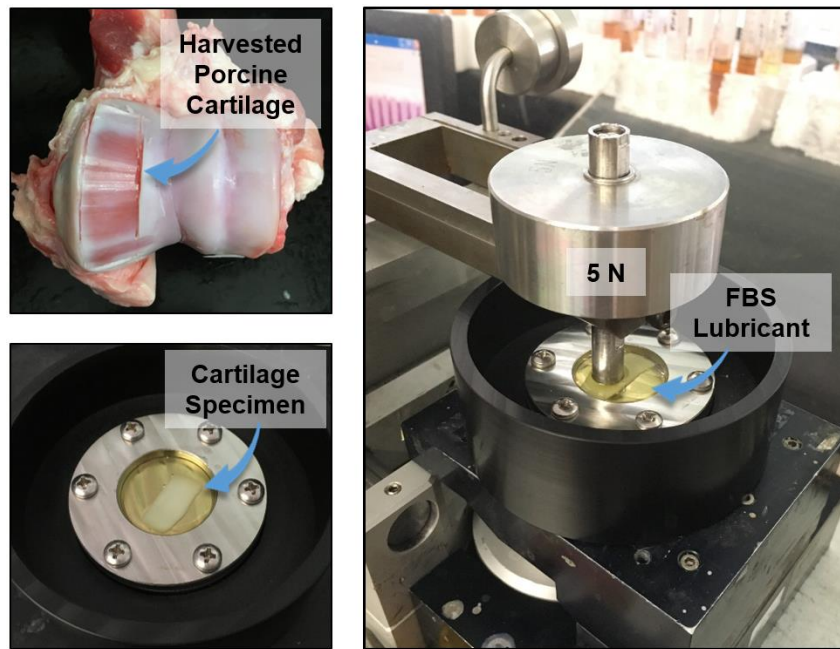

**Figure S3.** Friction testing (tribology) of harvested porcine articular cartilage.

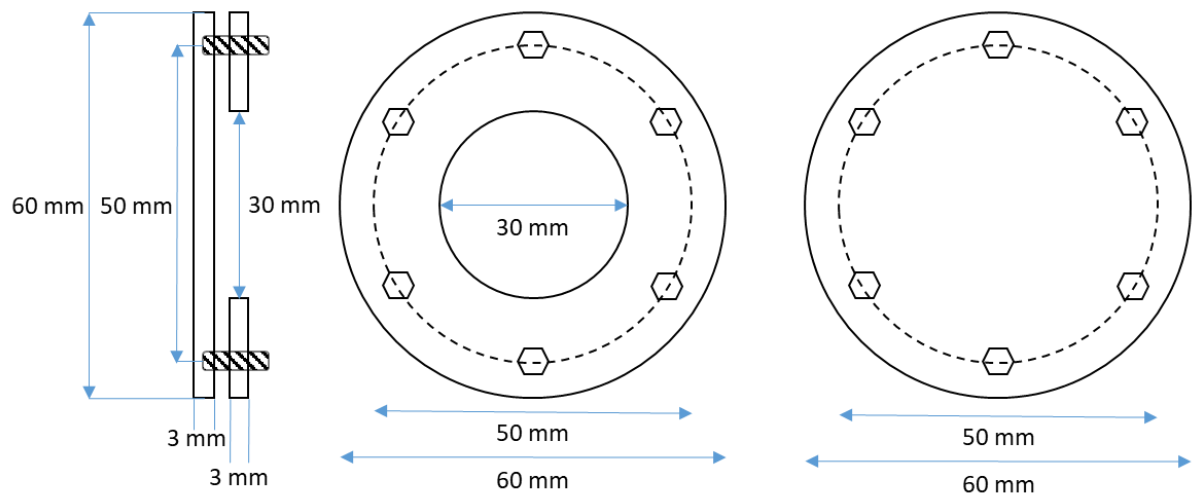

**Scheme S1.** Friction testing (tribology) specimen clamp drawing.

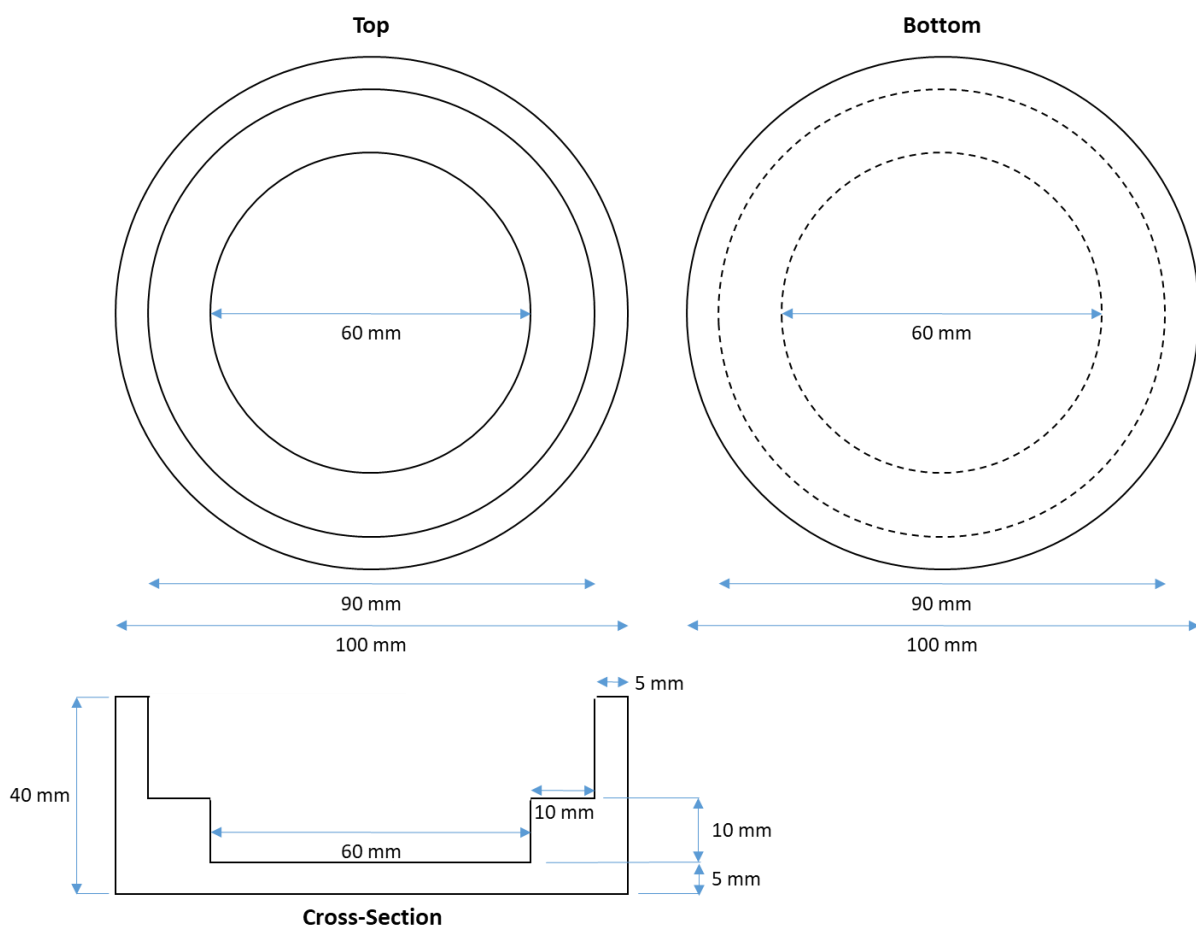

**Scheme S2.** Friction testing (tribology) submersion chamber drawing.

**Table S1.** DN hydrogels detailing 1<sup>st</sup> network and 2<sup>nd</sup> network compositions as well as their thermal transitions (VPTTs).

| Hydrogel Type               | Composition              |                                      |                            | VPTT                |                       |
|-----------------------------|--------------------------|--------------------------------------|----------------------------|---------------------|-----------------------|
|                             | 1 <sup>st</sup> Network* | 2 <sup>nd</sup> Network <sup>+</sup> |                            |                     |                       |
|                             | AMPS (X)                 | NIPAAm                               | AAm (Y)<br>(wt% of NIPAAm) | T <sub>o</sub> (°C) | T <sub>max</sub> (°C) |
| PAMPS SN:                   |                          |                                      |                            |                     |                       |
| SN-AAm-0%                   | 1.5M                     | -                                    | -                          | -                   | -                     |
| PAMPS/PNIPAAm DN:           |                          |                                      |                            |                     |                       |
| DN-AAm-0%                   | 1.5 M                    | 2.0 M                                | 0 wt%                      | 32.8 ± 0.17         | 35.4 ± 0.22           |
| PAMPS/(PNIPAAm-co-AAm) DNs: |                          |                                      |                            |                     |                       |
| DN-AAm-5%                   | 1.5 M                    | 2.0 M                                | 5 wt%                      | 37.4 ± 0.33         | 41.6 ± 0.07           |
| DN-AAm-10%                  | 1.5 M                    | 2.0 M                                | 10 wt%                     | 41.4 ± 0.68         | 48.0 ± 0.19           |
| DN-AAm-15%                  | 1.5 M                    | 2.0 M                                | 15 wt%                     | 45.5 ± 0.25         | 52.6 ± 0.77           |

\*4 mol% BIS crosslinker, 0.1 mol% 2-oxoglutaric acid initiator

<sup>+</sup>0.1 mol% BIS crosslinker, 0.1 mol% 2-oxoglutaric acid initiator

**Table S2.** Overall mechanical properties of the PAMPS/PNIPAAm-co-AAm) hydrogel series, including equilibrium water content; tensile modulus, strength and fracture strain; and compressive modulus, strength, fracture strain and toughness.

|                             | EWC (%)      | Tensile Properties |             |              | Compressive Properties |            |            |                                      |
|-----------------------------|--------------|--------------------|-------------|--------------|------------------------|------------|------------|--------------------------------------|
|                             |              | E (MPa)            | σ (MPa)     | ε (%)        | E (MPa)                | σ (MPa)    | ε (%)      | U <sub>t</sub> (MJ m <sup>-3</sup> ) |
| PAMPS SN:                   |              |                    |             |              |                        |            |            |                                      |
| SN-AAm-0%                   | 96.55 ± 0.00 | 0.33 ± 0.046       | 0.04 ± 0.02 | 10.8 ± 4.1   | 0.65 ± 0.02            | 0.54 ± 0.1 | 34.4 ± 0.8 | 0.07 ± 0.01                          |
| PAMPS/PNIPAAm DN:           |              |                    |             |              |                        |            |            |                                      |
| DN-AAm-0%                   | 86.3 ± 0.17  | 1.00 ± 0.04        | 1.61 ± 0.04 | 147.8 ± 9.2  | 1.09 ± 0.14            | 14.1 ± 0.5 | 78.8 ± 1.8 | 2.63 ± 0.07                          |
| PAMPS/(PNIPAAm-co-AAm) DNs: |              |                    |             |              |                        |            |            |                                      |
| DN-AAm-5%                   | 83.9 ± 0.11  | 1.04 ± 0.05        | 1.57 ± 0.06 | 139.4 ± 13.7 | 1.19 ± 0.06            | 23.7 ± 2.4 | 86.9 ± 1.9 | 4.31 ± 0.48                          |
| DN-AAm-10%                  | 83.9 ± 0.21  | 1.13 ± 0.06        | 1.54 ± 0.12 | 128.0 ± 20.5 | 1.09 ± 0.05            | 25.8 ± 3.5 | 90.8 ± 2.6 | 4.69 ± 0.68                          |
| DN-AAm-15%                  | 83.5 ± 0.16  | 1.15 ± 0.09        | 1.53 ± 0.04 | 131.0 ± 13.1 | 1.08 ± 0.04            | 24.1 ± 4.2 | 89.9 ± 3.1 | 4.39 ± 0.80                          |
| Cartilage                   |              |                    |             |              |                        |            |            |                                      |
| Porcine Cartilage           | 76.5 ± 2.12  | -                  | -           | -            | 1.04 ± 0.35            | 30.6 ± 6.5 | 77.8 ± 9.9 | 7.03 ± 2.37                          |

EWC = equilibrium water content, E = elastic modulus, σ = stress, ε = strain, U<sub>t</sub> = compressive toughness (deformation energy)
